# Supplementary material for: Outcome of EGFR-mutated NSCLC patients with MET-driven resistance to EGFR tyrosine kinase inhibitors
Source: PubMed Central journal article supplement (PMC5739624; doi:10.18632/oncotarget.21707), 2017-10-09
Supplement: oncotarget-08-105103-s001.pdf [file oncotarget-08-105103-s001.pdf]

## Outcome of EGFR-mutated NSCLC patients with MET-driven resistance to EGFR tyrosine kinase inhibitors

### SUPPLEMENTARY MATERIALS

**Supplementary Table 1: Re-biopsy characteristics.** \* : range ; † : one missing data in total population ; TKI : tyrosine kinase inhibitor ; p : p value

|                                                                | Overall population<br>n = 42 | MET amplification<br>n = 19 | MET overexpression<br>no MET amplification<br>n = 17 | p    | T790M+<br>n = 11 | T790M-<br>n = 30 | p            |
|----------------------------------------------------------------|------------------------------|-----------------------------|------------------------------------------------------|------|------------------|------------------|--------------|
| Re-biopsy obtained after EGFR TKI RECIST progression           | 38 (90,5%)                   | 15 (78,9%)                  | 17 (100%)                                            | 0,11 | 10 (90,9%)       | 27 (90%)         | 1            |
| Number of lines ongoing or over at the time of re-biopsy       |                              |                             |                                                      | 1    |                  |                  | 1            |
| ≤2                                                             | 37 (88,1%)                   | 17 (89,5%)                  | 15 (88,2%)                                           |      | 10 (90,9%)       | 26 (86,7%)       |              |
| ≥3                                                             | 5 (11,9%)                    | 2 (10,5%)                   | 2 (11,8%)                                            |      | 1 (9,1%)         | 4 (13,3%)        |              |
| Median time between re-biopsy and EGFR TKI initiation (months) | 15,6 (2,1-61,3)*             | 14,1 (3,6-31,8)*            | 20,7 (2,1-31,3)*                                     | 0,39 | 22,1 (9,1-36)*   | 12,1 (2,1-61,3)* | <b>0,050</b> |
| Re-biopsy obtained while TKI EGFR is still ongoing†            | 28 (68,3%)                   | 15 (79,0%)                  | 9 (56,3%)                                            | 0,15 | 5 (50%)          | 23 (76,7%)       | 0,13         |
| Re-biopsy site                                                 |                              |                             |                                                      |      |                  |                  |              |
| Lung                                                           | 23(54,8%)                    | 12(63,2%)                   | 8(47,1%)                                             |      | 6(54,5%)         | 16(53,3%)        |              |
| Pleura                                                         | 3(7,1%)                      | 2(10,5%)                    | 1(5,9%)                                              |      | 0(0%)            | 3(10%)           |              |
| Lymph node metastasis                                          | 4(9,5%)                      | 1(5,3%)                     | 1(5,9%)                                              |      | 1(9,1%)          | 3(10%)           |              |
| Brain                                                          | 3(7,1%)                      | 0(0%)                       | 3(17,6%)                                             |      | 1(9,1%)          | 2(6,7%)          |              |
| Liver                                                          | 4(9,5%)                      | 2(10,5%)                    | 1(5,9%)                                              |      | 2(18,2%)         | 2(6,7%)          |              |
| Skin                                                           | 1(2,4%)                      | 1(5,3%)                     | 0(0%)                                                |      | 0(0%)            | 1(3,3%)          |              |
| Adrenal glands                                                 | 2(4,8%)                      | 0(0%)                       | 2(11,8%)                                             |      | 0(0%)            | 2(6,7%)          |              |
| Bone                                                           | 1(2,4%)                      | 0(0%)                       | 1(5,9%)                                              |      | 1(9,1%)          | 0(0%)            |              |
| Muscle                                                         | 1(2,4%)                      | 1(5,3%)                     | 0(0%)                                                |      | 0(0%)            | 1(3,3%)          |              |

**Supplementary Table 2: First EGFR TKI therapy and MET alterations of patients with an EGFR exon 19 deletion or an EGFR exon 21 mutation on the initial biopsy. \*: % calculated with the number of patients with a MET FISH ; \*\*: % calculated with the number of patients with a MET IHC ; TKI : tyrosine kinase inhibitor ; IHC : Immunochemistry ; FISH : Fluorescence In Situ Hybridization ; p : p value**

|                                   | Patients with EGFR exon 19 deletion | Patients with EGFR exon 21 L858R mutation | p    |
|-----------------------------------|-------------------------------------|-------------------------------------------|------|
|                                   | N = 23                              | N = 16                                    |      |
| <b>First EGFR TKI</b>             |                                     |                                           | 1    |
| gefitinib or erlotinib            | 22 (95,7%)                          | 16 (100%)                                 |      |
| afatinib                          | 1 (4,3%)                            | 0 (0%)                                    |      |
| <b>MET FISH on re-biopsy</b>      | 21 (91,3%)                          | 12 (75%)                                  | 0,21 |
| <b>MET amplified on re-biopsy</b> | 12 (57,1%)*                         | 6 (50%)*                                  | 0,73 |
| <b>MET IHC on re-biopsy</b>       | 20 (87%)                            | 13 (81,25%)                               | 0,67 |
| <b>MET IHC 3+ on re-biopsy</b>    | 20 (100%)**                         | 13 (100%)**                               | 1    |

**Supplementary Table 3: Molecular alterations and prognosis of T790M positive patients. \* lost of follow up immediately after EGFR TKI progression. \* patient 45 : the T790M mutation was not detected on the re-biopsy displaying MET amplification. However, very few tumor cells were found in this sample. The T790M mutation was detected in a tumor biopsy obtained before the re-biopsy displaying MET amplification in this patient. † patient 46 : the research of T790M mutation was not performed on the re-biopsy displaying MET amplification. The T790M mutation was detected in circulating free DNA in this patient. OS : overall survival. PPOS : post progression overall survival. OS and PPOS are expressed in months**

| ID              | MET amplification | Primary EGFR mutation  | OS    | PPOS |
|-----------------|-------------------|------------------------|-------|------|
| 5               | +                 | Exon 19 deletion       | 121,3 | 8,7  |
| 16              | -                 | Exon 21 L858R mutation | 26,7  | 16,0 |
| 18              | +                 | Exon 21 L858R mutation | 43,1  | 36,9 |
| 22              |                   | Exon 19 deletion       | 36,6  | 14,6 |
| 26              | -                 | Exon 19 deletion       | 36,2  | 23,8 |
| 27              |                   | Exon 21 L858R mutation | 25,0  | 17,0 |
| 28              | +                 | Exon 21 L858R mutation | 21,8  | 1,6  |
| 34*             | -                 | Exon 19 deletion       | 37,1  | 0    |
| 35              |                   | Exon 19 deletion       | 27,7  | 13,7 |
| 45**            | +                 | Exon 19 deletion       | 33,8  | 18,6 |
| 46 <sup>†</sup> | +                 | Exon 19 deletion       | 44,3  | 12,9 |
